# Supplementary material
Source: PubMed Central journal article supplement (PMC4110925)
Supplement: supp_ntu057_Suppl_Table_1_ITT_interactions_090513.pdf [file supp_ntu057_Suppl_Table_1_ITT_interactions_090513.pdf]

**Supplemental Table 1.** Two way interactions on 12 month outcomes in the ITT<sup>a</sup> sample.

| Two-way interactions                       | 7 day PPA <sup>b</sup><br>(N=1865) |             | Adjunct treatment<br>utilization (N = 1838) <sup>c</sup> |                          |
|--------------------------------------------|------------------------------------|-------------|----------------------------------------------------------|--------------------------|
|                                            | N                                  | % abstinent | N                                                        | % utilizing<br>treatment |
| <b>Tone &amp; Testimonials</b>             |                                    |             |                                                          |                          |
| Prescriptive, Testimonials                 | 466                                | 12.2        | 463                                                      | 26.3                     |
| Prescriptive, No testimonials              | 466                                | 13.7        | 457                                                      | 25.8                     |
| Motivational, Testimonials                 | 467                                | 15.4        | 463                                                      | 24.2                     |
| Motivational, No testimonials              | 466                                | 13.5        | 455                                                      | 27.5                     |
| <b>Tone &amp; Navigation</b>               |                                    |             |                                                          |                          |
| Prescriptive, Dictated                     | 467                                | 14.3        | 460                                                      | 26.7                     |
| Prescriptive, Autonomous                   | 465                                | 11.6        | 460                                                      | 25.4                     |
| Motivational, Dictated                     | 467                                | 14.6        | 460                                                      | 25.2                     |
| Motivational, Autonomous                   | 466                                | 14.4        | 458                                                      | 26.4                     |
| <b>Tone &amp; Proactive emails</b>         |                                    |             |                                                          |                          |
| Prescriptive, Emails                       | 466                                | 12.7        | 458                                                      | 22.7                     |
| Prescriptive, No emails                    | 466                                | 13.3        | 462                                                      | 29.4                     |
| Motivational, Emails                       | 467                                | 13.9        | 458                                                      | 24.7                     |
| Motivational, No emails                    | 466                                | 15.0        | 460                                                      | 27.0                     |
| <b>Testimonials &amp; Navigation</b>       |                                    |             |                                                          |                          |
| Testimonials, Dictated                     | 466                                | 13.9        | 464                                                      | 25.9                     |
| Testimonials, Autonomous                   | 467                                | 13.7        | 462                                                      | 24.7                     |
| No testimonials, Dictated                  | 468                                | 15.0        | 456                                                      | 26.1                     |
| No testimonials, Autonomous                | 464                                | 12.3        | 456                                                      | 27.2                     |
| <b>Testimonials &amp; Proactive emails</b> |                                    |             |                                                          |                          |
| Testimonials, Emails                       | 467                                | 14.3        | 463                                                      | 24.4                     |
| Testimonials, No emails                    | 466                                | 13.3        | 463                                                      | 26.1                     |
| No testimonials, Emails                    | 466                                | 12.2        | 453                                                      | 23.0                     |
| No testimonials, No emails                 | 466                                | 15.0        | 459                                                      | 30.3                     |
| <b>Navigation &amp; Proactive emails</b>   |                                    |             |                                                          |                          |
| Dictated, Emails                           | 467                                | 13.9        | 457                                                      | 24.9                     |
| Dictated, No emails                        | 467                                | 15.0        | 463                                                      | 27.0                     |
| Autonomous, Emails                         | 466                                | 12.7        | 459                                                      | 22.4                     |
| Autonomous, No emails                      | 465                                | 13.3        | 459                                                      | 29.4                     |

<sup>a</sup> Intent to treat (ITT)

<sup>b</sup> Point prevalent abstinence (PPA)

<sup>c</sup> Twenty-seven participants were excluded for not being enrolled in the health plan during the study period and having no access to the provided adjunct treatment.
